# Supplementary material for: Identification of Stripe Rust Resistance Genes in Common Wheat Cultivars and Breeding Lines from Kazakhstan
Source: MDPI journal article supplement (doi:10.3390/plants10112303), 2021-10-26
Supplement: s1 [file s1]

## Article

# Identification of Stripe Rust Resistance Genes in Common Wheat Cultivars and Breeding Lines from Kazakhstan

Alma Kokhmetova <sup>1, \*</sup>, Aralbek Rsaliyev <sup>2</sup>, Makpal Atishova <sup>1</sup>, Madina Kumarbayeva <sup>1</sup>, Zhenis Keishilov <sup>1</sup> and Angelina Malysheva <sup>1</sup>

## Supplementary Materials

**Table S1.** Analysis of variance (ANOVA) for stripe rust resistance and the estimated broad sense heritability.

|         | Source      | df  | SS         | MS       | F             | (h <sup>2</sup> ) |
|---------|-------------|-----|------------|----------|---------------|-------------------|
| YR 2019 | Genotype    | 69  | 50015,357  | 724,8602 | 15,781**      | 0,89              |
|         | Replication | 2   | 11,428     | 5,7142   | 4,124*        |                   |
|         | Residuals   | 138 | 6338,571   | 45,9317  |               |                   |
|         | Total       | 209 | 56365,357  |          |               |                   |
| YR 2020 | Genotype    | 69  | 61055,357  | 884,8602 | 18,27223172** | 0,89              |
|         | Replication | 2   | 517,143    | 258,5714 | 5,339*        |                   |
|         | Residuals   | 138 | 6682,8571  | 48,4265  |               |                   |
|         | Total       | 209 | 68255,3571 |          |               |                   |

\* P < 0.01. \*\* P < 0.001. YR, yellow rust; df, degree of freedom; SS, sum of squares; MS, mean squares; h<sup>2</sup>, broad-sense heritability index.

**Table S2.** An average coefficient of infection values (ACI) of the wheat germplasms carrying the stripe rust resistance genes (Almalybak, Almaty region, Kazakhstan, 2019 and 2020).

| Cat # | Cultivar (line)                                             | Yr gene detected based on linked marker | <sup>a</sup> ACI value |                 | <sup>b</sup> ACI rank |
|-------|-------------------------------------------------------------|-----------------------------------------|------------------------|-----------------|-----------------------|
|       |                                                             |                                         | 1st observation        | 2nd observation |                       |
| 42    | #23/Kupava-7                                                | Yr10, Yr15                              | 0                      | 0               | 1                     |
| 23    | 5-ICARDA-IPBB-2013                                          | Yr10                                    | 0                      | 0,5             | 1                     |
| 30    | Naz/GF55-2                                                  | Yr10, Yr15                              | 0                      | 0,5             | 1                     |
| 44    | #23/Kupava-12                                               | Yr5                                     | 0                      | 0,5             | 1                     |
| 46    | #23/Kupava-24                                               | Yr5, Yr10                               | 0                      | 0,5             | 1                     |
| 41    | #23/Kupava-5                                                | Yr15                                    | 0,5                    | 1               | 1                     |
| 28    | Almaly/YR4/Naz                                              | Yr10                                    | 0                      | 2               | 1                     |
| 66    | Tungysh                                                     | Yr5                                     | 0                      | 2               | 1                     |
| 9     | 114Novosibirskaya-22/Omskaya37/28                           | Yr5, Yr17, Yr18                         | 0,5                    | 2               | 1                     |
| 14    | 1777Darya/1724F1-1581/807 F4/Naz /Umanka/Almaly/Zimorodok-2 | Yr5                                     | 0,5                    | 2               | 1                     |
| 45    | #23/Kupava-16                                               | Yr10                                    | 0,5                    | 2               | 1                     |
| 53    | Keremet                                                     | Yr15                                    | 0,5                    | 2,5             | 1                     |
| 65    | Sultan2                                                     | Yr10                                    | 0                      | 3               | 1                     |
| 29    | RILS-F9 Almaly/Avoset 'S'                                   | Yr15                                    | 0,5                    | 3               | 1                     |
| 33    | Taza/MK 3750-2                                              | Yr5, Yr10                               | 0,5                    | 3               | 1                     |
| 5     | Adir/YR2                                                    | Yr10                                    | 1                      | 4               | 1                     |
| 7     | Viza/Zhenis                                                 | Yr10                                    | 1                      | 4               | 1                     |
| 20    | 1010/93f3/N23/Kupava/Mereke70-1                             | Yr5, Yr18                               | 1                      | 4               | 1                     |

|            |                                                                |                 |      |      |      |
|------------|----------------------------------------------------------------|-----------------|------|------|------|
| 54         | Karasay                                                        | Yr10, Yr18      | 2,5  | 4    | 1    |
| 58         | Mereke70                                                       | Yr5, Yr10, Yr18 | 1,5  | 6    | 1    |
| 63         | Dinara                                                         | Yr5             | 2    | 6    | 1    |
| 32         | Taza/MK 3750-1                                                 | Yr10            | 2,5  | 6    | 1    |
| 36         | 428/MK-122A                                                    | Yr10            | 2,5  | 6    | 1    |
| 52         | Adir                                                           | Yr10            | 2,5  | 6    | 1    |
| 61         | Naz                                                            | Yr10            | 2,5  | 6    | 1    |
| 62         | Nureke                                                         | Yr18            | 2,5  | 6    | 1    |
| 13         | 1777Darya/1724F1-1581/807F4 /Naz/Umanka/Almaly/<br>Zimorodok-1 | Yr5, Yr10, Yr18 | 2    | 7    | 1    |
| 67         | Taza                                                           | Yr5             | 2,5  | 7    | 1    |
| 68         | Intensivnaya                                                   | Yr10            | 0,5  | 8    | 1    |
| 69         | Zimorodok                                                      | Yr5             | 4    | 10   | 1    |
| 39         | 425/GF55-2                                                     | Yr10            | 2,5  | 12   | 2    |
| 34         | Naz/GF55-3                                                     | Yr5, Yr10       | 4    | 12   | 2    |
| 60         | Matay                                                          | Yr10            | 5    | 12   | 2    |
| 37         | Naz/GF55-4                                                     | Yr10            | 6    | 12   | 2    |
| 70         | Almaly                                                         | Yr18            | 10   | 12   | 2    |
| 2          | Almaly/GF70                                                    | Yr18            | 4    | 20   | 2    |
| 3          | 425/GF55-1                                                     | Yr15, Yr18      | 10   | 20   | 2    |
| 4          | Kupava/ YR5/6/Avocet'S'                                        | Yr5             | 10   | 20   | 2    |
| 64         | Kupava                                                         | Yr18            | 11   | 20   | 2    |
| 40         | Almaly/GF70/2                                                  | Yr15            | 12   | 20   | 2    |
| 35         | Almaly/GF92                                                    | Yr18            | 16   | 31   | 4    |
| 38         | 425/Renan                                                      | Yr17            | 20   | 32   | 4    |
| Controls   |                                                                |                 |      |      |      |
| 71         | Morocco                                                        | -               | 55   | 85   | 4    |
| 71         | Avocet S*6/Yr5                                                 | Yr5             | 0    | 0,5  | 1    |
| 72         | Avocet S*6/Yr10                                                | Yr10            | 0    | 1,5  | 1    |
| 73         | Avocet S*6/Yr15                                                | Yr15            | 0    | 0,5  | 1    |
| 74         | YR17/LR37/NIL-LR37/TC-6/VPM-RL6081                             | Yr17            | 5    | 14   | 2    |
| 75         | YR18/NIL-LR34/TC-6/PI58548                                     | Yr18            | 1,5  | 6    | 1    |
| 76         | Avocet S                                                       | -               | 55   | 90   | 4    |
| Average    |                                                                |                 | 3,44 | 8,04 | 1,38 |
| LSD (p=5%) |                                                                |                 | 5,91 | 7,96 | -    |

<sup>a</sup>ACI – average coefficient of infection values for two years.

<sup>b</sup>ACI rank of the level of resistance based on disease score across 42 carriers of Yr genes based on 2nd observation: wheat entries having ACI values of 0-10, 11-20, 21-30, 31-60 were regarded as possessing high (R), moderate-resistant (MR), moderate-susceptible (MS) and low (S) level of adult plant resistance.

**Table S3.** Mean daily temperature and relative humidity s (Almalybak, Almaty region, Kazakhstan, 2019 and 2020).

| Year | Month | Temperature (°C) | Monthly rainfalls (mm) | Average relative humidity (%) |
|------|-------|------------------|------------------------|-------------------------------|
| 2019 | April | 11,4             | 168                    | 59,50                         |
|      | May   | 16,6             | 39                     |                               |
|      | June  | 21,6             | 72                     |                               |
| 2020 | April | 11,4             | 140                    | 57,30                         |
|      | May   | 16,6             | 47                     |                               |
|      | June  | 21,8             | 30                     |                               |

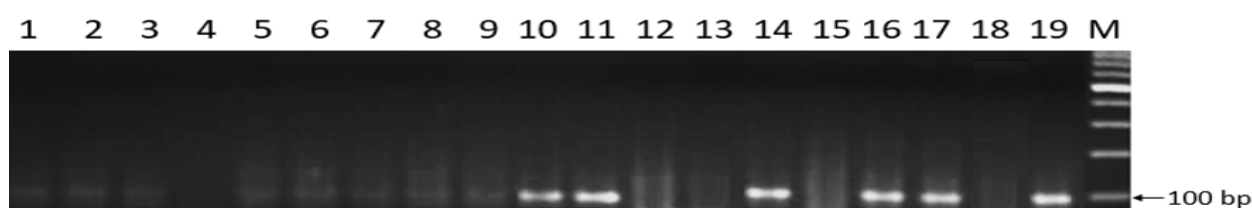

1, 5221/Almaly; 2, Naz/GF66/Ulugbek600-1; 3, Naz/GF66/Ulugbek600-2; 4, Naz/Immun78/MK3750; 5, Almaly/YR4/Naz; 6, RILS-F9 Almaly/Avocet 'S'; 7, Naz/GF55-2; 8, Bogarnaya56/5515/K-47100-Romania; 9, Taza/MK 3750-1; 10, Taza/MK 3750-2; 11, Naz/GF55-3; 12, Almaly/GF92; 13, 428/MK-122A; 14, #23/Kupava-12; 15, #23/Kupava-16; 16, #23/Kupava-24; 17, 1010/93/#23/Kupava/Mereke/Naz; 18, Avocet'S' (negative control); 19, Avocet S\*6/Yr5 (positive control); M - molecular weight marker (Gene-Ruler, 100 bp DNA ladder).

**Figure S1.** DNA amplification products of wheat entries using primers to the STS S19M93 locus linked with the *Yr5* resistance gene. The arrows show the band size of *Yr5*-carrying germplasm (100 bp). The sizes of the bands for *Yr5* are 100 bp (lanes 10, 11, 14, 16, 17 and 19 – positive control). .

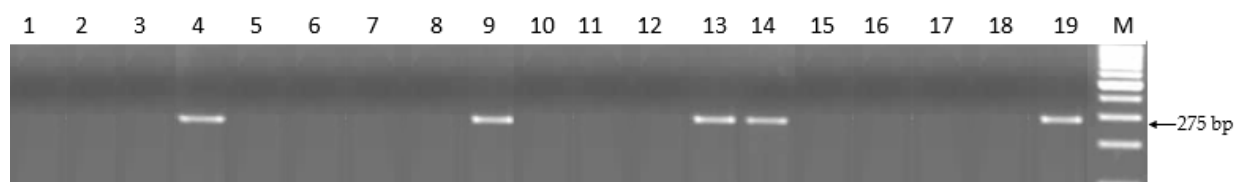

1, Naz/GF55-1; 2, Almaly/GF70; 3, 425/GF55-1; 4, Kupava/ YR5/6/Avocet'S'; 5, Adir/YR2; 6- Sanzar8/BWKLDN9; 7, Vi-za/Zhenis; 8, 1777Darya/#72Tungysh; 9, 114Novosibirskaya-22/Omskaya37/28; 10, 1777Darya/Tungysh-1; 11, 1777Darya/Tungysh-2; 12, 1777Darya/Tungysh-3; 13, 1777Darya/1724F1-1581/807F4/Naz/Umanka/Almaly/Zimorodok-1; 14, 1777Darya/1724F1-1581/807 F4/Naz /Umanka/Almaly/Zimorodok-2; 15, 12/1613MP-2011/1027/AVS/Ulugbek600/Egemen; 16, 1017/103f3/N91/5353/Egemen-1; 17,1017/103f3/N91/5353/Egemen-2; 18, Avocet'S' (negative control); 19, Avocet S\*6/Yr5 (positive control); M – molecular weight marker (Gene-Ruler, 100 bp DNA ladder).

**Figure S2.** DNA amplification products of wheat entries using primers to the STS S23M41locus linked with the *Yr5* resistance gene. The arrows show the band size of *Yr5*-carrying germplasm (275 bp). The sizes of the bands for *Yr5* are 275 bp (lanes 4, 9, 13, 14 and 19 – positive control). .

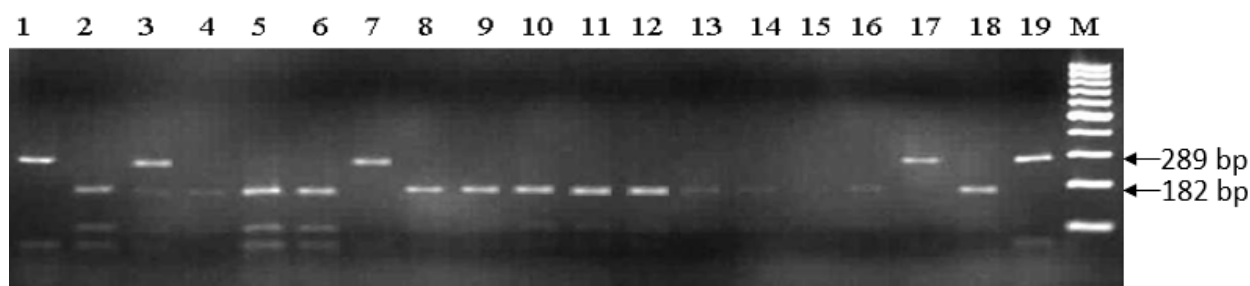

1, Kupava/ YR5/6/Avocet'S'; 2, Adir/YR2; 3, 114Novosibirskaya-22/Omskaya37/28; 4, 1777Darya/Tungysh-1; 5, 1777Darya/Tungysh-2; 6, 1777Darya/Tungysh-3; 7, 1777Darya/1724F1-1581/807F4 /Naz/Umanka/Almaly/ Zimorodok-1; 8, 12/1613MP-2011/1027/AVS/ Ulugbek600 /Egemen; 9, 1017/103f3/N91/5353/Egemen; 10, 1017/103f3/N91/5353/Egemen; 11, 1011/94f3/N23/Knyazhna/Naz-1; 12, 1011/94f3/N23/Knyazhna/Naz-2; 13, 1010/93f3/N23/Kupava/Mereke70-2; 14, Rilsalmaly/Anza; 15, 5-ICARDA-IPBB-2013; 16, 5221/Almaly; 17, 1010/93f3/N23/Kupava/Mereke70-1; 18, Avocet'S' (negative control); 19, Avocet S\*6/Yr5 (positive control); M – molecular weight marker (Gene-Ruler, 100 bp DNA ladder).

**Figure S3.** DNA amplification products of wheat entries using primers to the STS-9/10 locus linked with the *Yr5* re-Scheme 5. carrying (289 bp) and *Yr5*-none-carrying (182 bp) germplasm. PCR products were digested with *DpnII*; the sizes of the top bands are 289 bp for *Yr5* (lanes 1, 3, 7, 17 and 19– positive control) and 200 bp for non-carriers of *Yr5* (lanes 2-6, 8-16, and 18 – negative control).

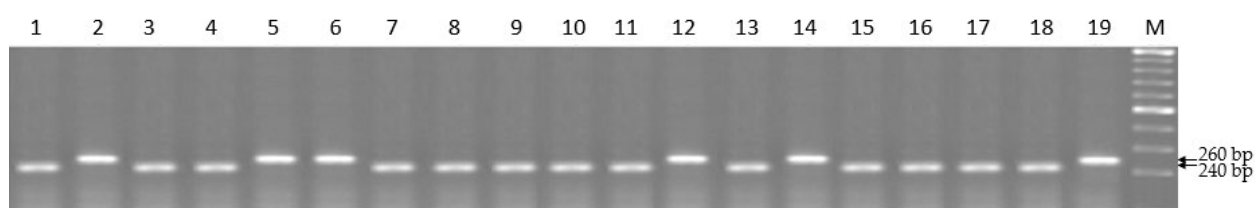

1, Kupava/YR5/6/Avocet'S'; 2, Adir/YR2, 3- Sanzar8/BWKLDN9; 4, 1777Darya/#72Tungysh; 5, Viza/Zhenis; 6, 5-ICARDA-IPBB-2013; 7, 1017/103f3/N91/5353/Egemen-1; 8, 1017/103f3/N91/5353/Egemen-2; 9, 1011/94f3/N23/Knyazhna/Naz-1; 10, 1011/94f3/N23/Knyazhna/Naz-2; 11, 1010/93f3/N23/Kupava/Mereke70-1; 12, Naz/GF55-2, 13- Naz/GF66/Ulugbek600-1; 14, Taza/MK 3750-1; 15, Almaly/GF70/2; 16, #23/Kupava-5; 17, #23/Kupava-10; 18, Avocet'S' (negative control); 19, Avocet S\*6/Yr10 (positive control); M -molecular weight marker (Gene-Ruler, 100 bp DNA ladder).

**Figure S4.** DNA amplification products of wheat entries using primers to the SSR Xpsp3000 locus linked with the *Yr10* resistance gene. The arrows show the band size of *Yr10*-carrying (260 bp) and *Yr10*-none-carrying (240 bp) germplasm. The sizes of the top bands are 260 bp for *Yr10* (lanes 2, 5, 6, 12, 14, and 19– positive control) and 240 bp for non-carriers of *Yr10* (lanes 1, 3, 4, 7-11, 13, 15, 16, and 18 – negative control).

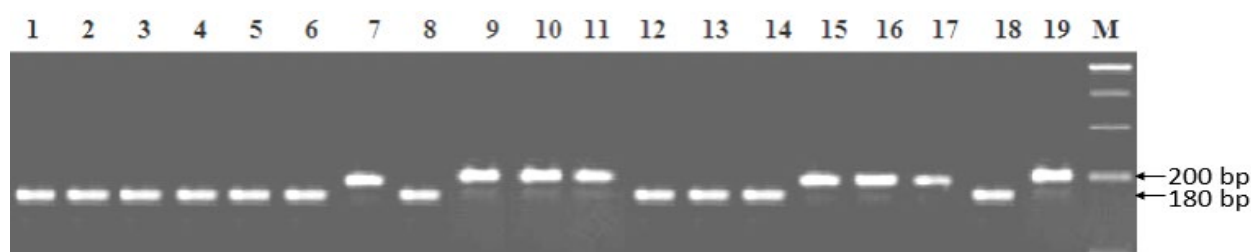

1, Naz/GF55-1; 2, Almaly/GF70; 3, 425/GF55-1; 4, Kupava/YR5/6/Avocet'S'; 5, Sanzar8/BWKLDN9; 6, 1777Darya/#72Tungysh; 7, Viza/Zhenis; 8, 114Novosibirskaya-22/Omskaya37/28; 9, 5-ICARDA-IPBB-2013; 10, Almaly/YR4/Naz; 11, Naz/GF55-2; 12, Naz/GF66/Ulugbek600-1; 13, Naz/GF66/Ulugbek600-2; 14, Naz/Immun78/MK3750; 15, Taza/MK 3750-1; 16, Taza/MK 3750-2; 17, Naz/GF55-3; 18, Avocet'S' (negative control); 19 - Avocet S\*6/Yr10 (positive control); M -molecular weight marker (Gene-Ruler, 100 bp DNA ladder).

**Figure S5.** DNA amplification products of wheat entries using primers to the *Yr10SCAR* locus linked with the *Yr10* resistance gene. The arrows show the band size of *Yr10*-carrying (200 bp) and *Yr10*-none-carrying (180 bp) germplasm. The sizes of the top bands are 200 bp for *Yr10* (lanes 7, 9, 10, 11, 15, 16, 17, and 19– positive control) and 180 bp for non-carriers of *Yr10* (lanes 1-6, 8, 12, 13, 14, and 18 – negative control).

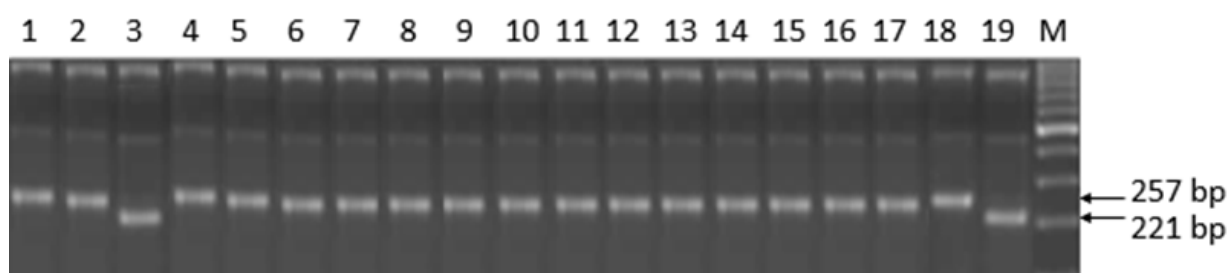

1- Naz/GF55-1, 2- Almaly/GF70, 3- 425/GF55-1, 4- Kupava/ YR5/6/Avocet'S', 5- Adir/YR2, 6- Sanzar8/BWKLDN9, 7- Viza/Zhenis, 8- 1777Darya/#72Tungysh, 9- 114Novosibirskaya-22/Omskaya37/28, 10- 1777Darya/Tungysh-1, 11- 1777Darya/Tungysh-2, 12- 1777Darya/Tungysh-3, 13- 1777Darya/1724F1-1581/807F4 /Naz/Umanaka/Almaly/ Zimorodok-1, 14- 1777Darya/1724F1-1581/807 F4/Naz /Umanaka/Almaly/Zimorodok-2, 15- 12/1613MP-2011/1027/AVS/ Ulugbek600 /Egemen, 16- 1017/103f3/N91/5353/Egemen-1, 17- 1017/103f3/N91/5353/Egemen-2, 18- Avocet'S' (negative control), 19 - Avocet S\*6/Yr15 (positive control), M -molecular weight marker (Gene-Ruler, 100 bp DNA ladder).

**Figure S6.** DNA amplification products of wheat entries using primers to the SSR Xbarc8 locus linked with the *Yr15* resistance gene. The arrows show the band size of *Yr15*-carrying (221 bp) and *Yr15*-none-carrying (257 bp) germplasm. The sizes of the bands are 221 bp for *Yr10* (lane 3, and 19– positive control) and 257 bp for non-carriers of *Yr15* (lanes 1, 2, 4-17, and 18 – negative control).

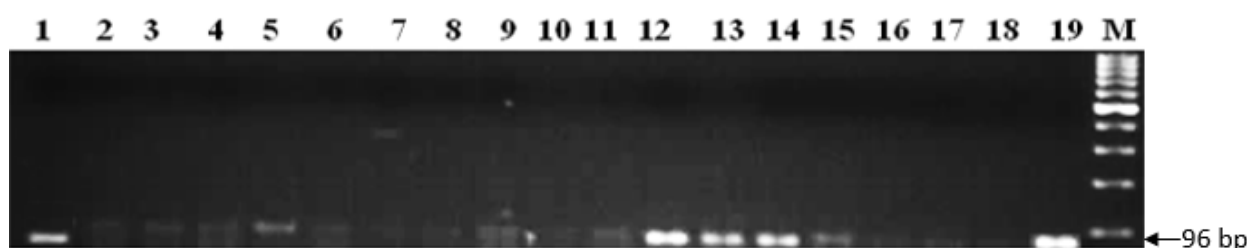

1, RILS-F9 Almaly/Avocet 'S'; 2, Almaly/YR4/Naz; 3, Bogarnaya56/5515/K-47100-Romania; 4, Taza/MK 3750-1; 5, Taza/MK 3750-2; 6, Naz/GF55; 7, Almaly/GF92; 8, 428/MK-122A; 9, Naz/GF55; 10, 425/Renan; 11, 425/GF55; 12, Almaly/GF70/2; 13, #23/Kupava-5; 14, #23/Kupava-7; 15, #23/Kupava-10; 16, #23/Kupava-12; 17, #23/Kupava-16; 18, Avocet'S' (negative control); 19, Avocet S\*6/Yr15 (positive control); M -molecular weight marker (Gene-Ruler, 100 bp DNA ladder).

**Figure S7.** DNA amplification products of wheat entries using primers to the SSR Xgwm413 locus linked with the *Yr15* resistance gene. The arrows show the band size of *Yr15*-carrying (96 bp). The sizes of the bands are 96 bp for *Yr15* (lane 1, 5, 12, 13, 14, 15, and 19– positive control).

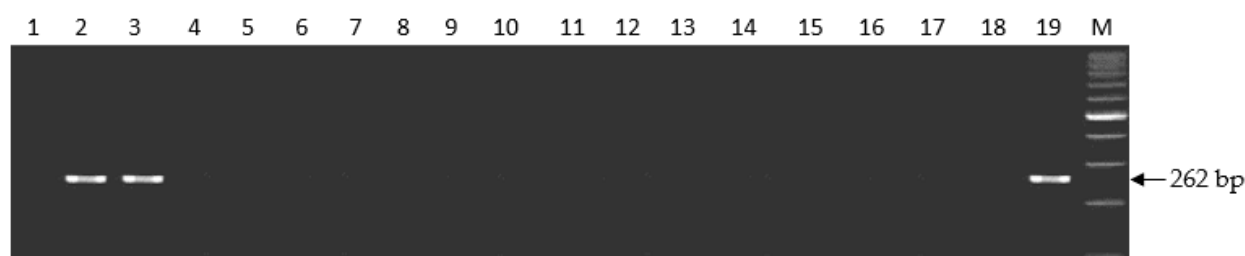

1, Naz/GF55-1; 2, 114Novosibirskaya-22/Omskaya37/28; 3, 425/Renan; 4, 1777Darya/Tungysh-1; 5, 1777Darya/Tungysh-2; 6, 1777Darya/Tungysh-3; 7, 1777Darya/1724F1-1581/807F4 /Naz/Umanaka/Almaly/ Zimorodok-1; 8, 1777Darya/1724F1-1581/807 F4/Naz /Umanaka/Almaly/Zimorodok-2; 9, 12/1613MP-2011/1027/AVS/Ulugbek600/Egemen; 10, 1017/103f3/N91/5353/Egemen-1; 11, 1017/103f3/N91/5353/Egemen-2; 12, 1011/94f3/N23/Knyazhna/Naz-1; 13, 1011/94f3/N23/Knyazhna/Naz-2; 14, 1010/93f3/N23/Kupava/Mereke70-1; 15, 1010/93f3/N23/Kupava/Mereke70-2; 16, Rils Almaly/Anza; 17, 5-ICARDA-IPBB-2013; 18, Avocet'S' (negative control); 19, YR17/LR37/NIL-LR37/TC-6/VPM-RL6081(positive control); M – molecular weight marker (Gene-Ruler, 100 bp DNA ladder).

**Figure S8.** DNA amplification products of wheat entries using primers to the Ventriup/LN2 locus linked with the *Yr17* resistance gene. The arrows show the band size of *Yr17*-carrying (262 bp). The sizes of the bands are 262 bp for *Yr17* (lane 2, 3, and 19– positive control).

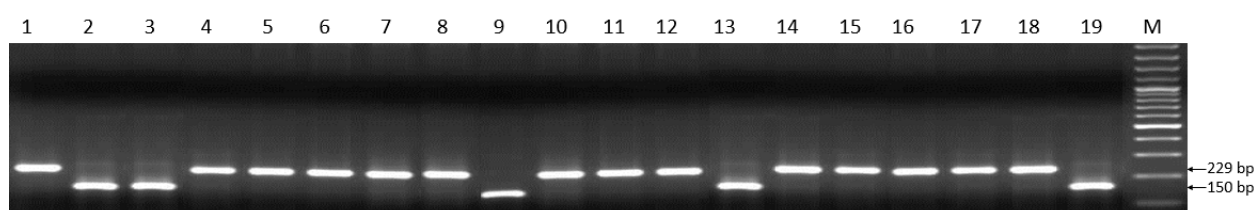

1- Naz/GF55-1, 2- Almaly/GF70, 3- 425/GF55-1, 4- Kupava/ YR5/6/Avocet'S', 5- Adir/YR2, 6- Sanzar8/BWKLDN9, 7- Vi-za/Zhenis, 8- 1777Darya/#72Tungysh, 9- 114Novosibirskaya-22/Omskaya37/28, 10- 1777Darya/Tungysh-1, 11- 1777Darya/Tungysh-2, 12- 1777Darya/Tungysh-3, 13- 1777Darya/1724F1-1581/807F4 /Naz/Umanaka/Almaly/ Zimorodok-1, 14- 1777Darya/1724F1-1581/807 F4/Naz /Umanaka/Almaly/Zimorodok-2, 15- 12/1613MP-2011/1027/AVS/ Ulugbek600 /Egemen, 16- 1017/103f3/N91/5353/Egemen-1, 17- 1017/103f3/N91/5353/Egemen-2, 18- Avocet'S' (negative control), 19 - YR18/NIL-LR34/TC-6/PI58548 (positive control), M -molecular weight marker (Gene-Ruler, 100 bp DNA ladder).

**Figure S9.** DNA amplification products of wheat entries using primers to the STS csLV34 locus linked with the *Yr18/Lr34* resistance gene. The arrows show the band size of *Yr18* -carrying (150 bp). The sizes of the bands are 229 bp for *Yr17* (lane 2, 3, and 19– positive control).
